# Supplementary material for: Comparison of source apportionment approaches and analysis of non-linearity in a real case model application
Source: Copernicus journal article supplement (doi:10.5194/gmd-2020-410), 2021-02-16
Supplement: Supplementary file 1 [file gmd-2020-410-supplement.pdf]

# Comparison of source apportionment approaches and analysis of non-linearity in a real case model application

Claudio A. Belis<sup>1</sup>, Guido Pirovano<sup>2</sup>, Maria Gabriella Villani<sup>3</sup>, Giuseppe Calori<sup>4</sup>, Nicola Pepe<sup>4</sup>, Jean Philippe Putaud<sup>1</sup>

<sup>1</sup> European Commission, Joint Research Centre, via Fermi 2748, 21027 Ispra (VA), Italy

<sup>2</sup> RSE Spa, via Rubattino 54, 20134, Milan, Italy

<sup>3</sup> ENEA Laboratory of Atmospheric Pollution, via Fermi 2748, 21027 Ispra (VA), Italy

<sup>4</sup> ARIANET s.r.l. via Gilino, 9 - 20128 Milan (MI) – Italy

## Supplementary Material

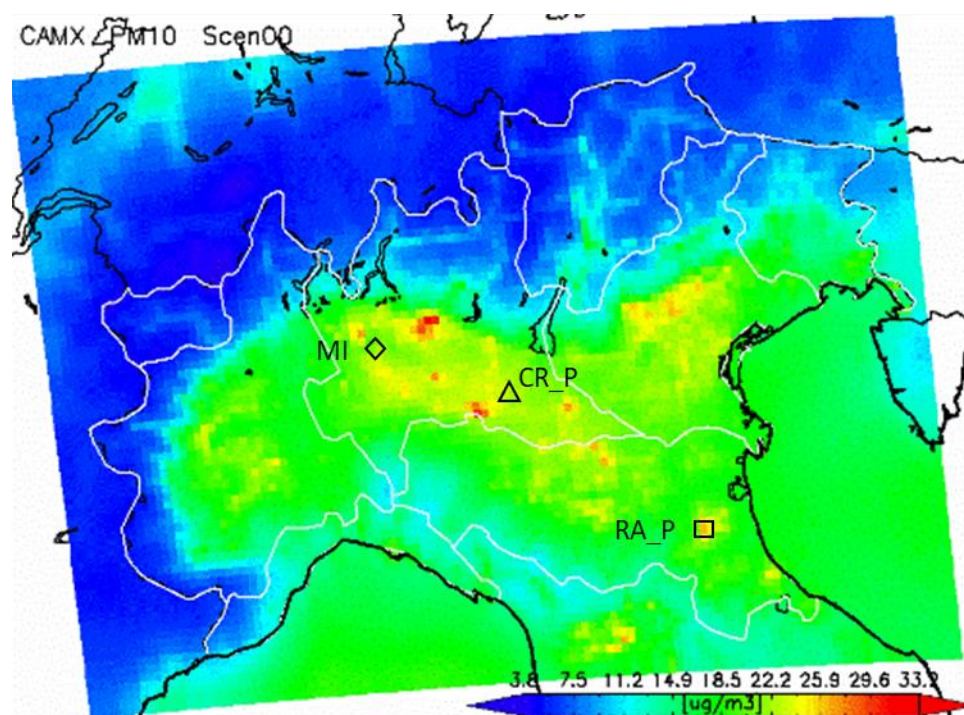

Figure S1. PM<sub>10</sub> yearly mean concentrations for 2010 obtained with CAMx. The empty markers indicate the sites for which a detailed analysis of interaction terms and gas ratio was carried out.

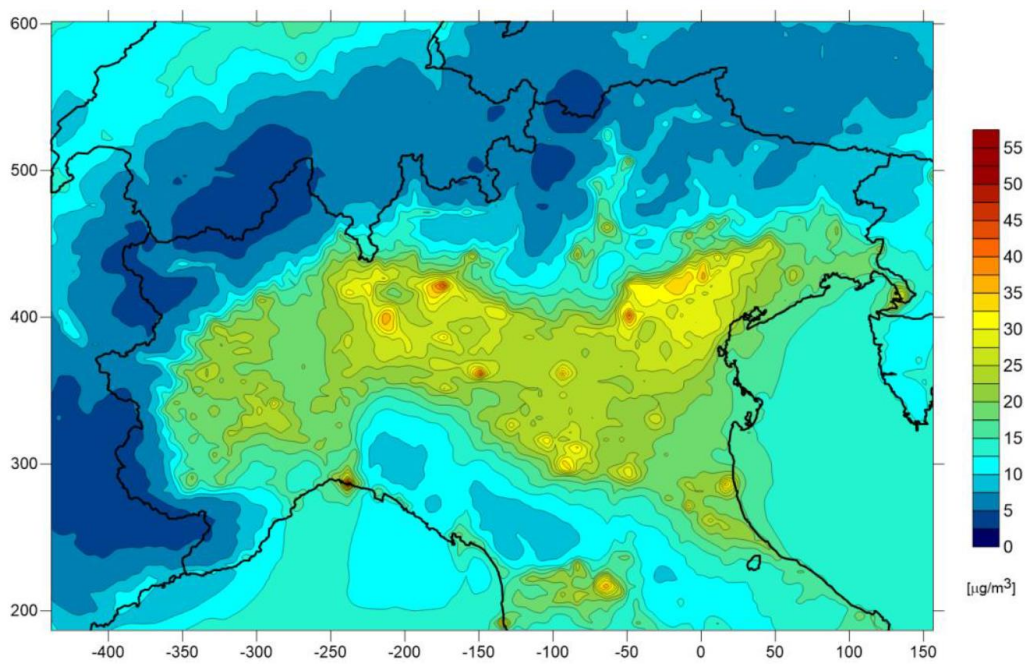

Figure S2.  $PM_{10}$  yearly mean concentrations for 2010 obtained with FARM

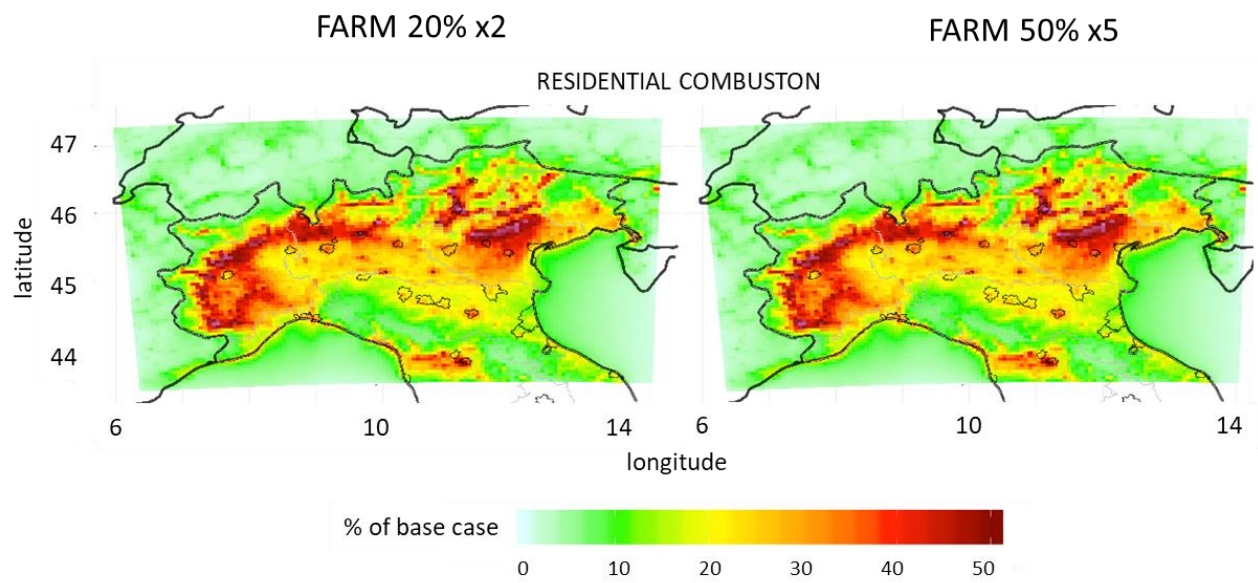

Figure S3. Annual average impacts of RES expressed as proportion of the base case for 20% and 50% ERLs.

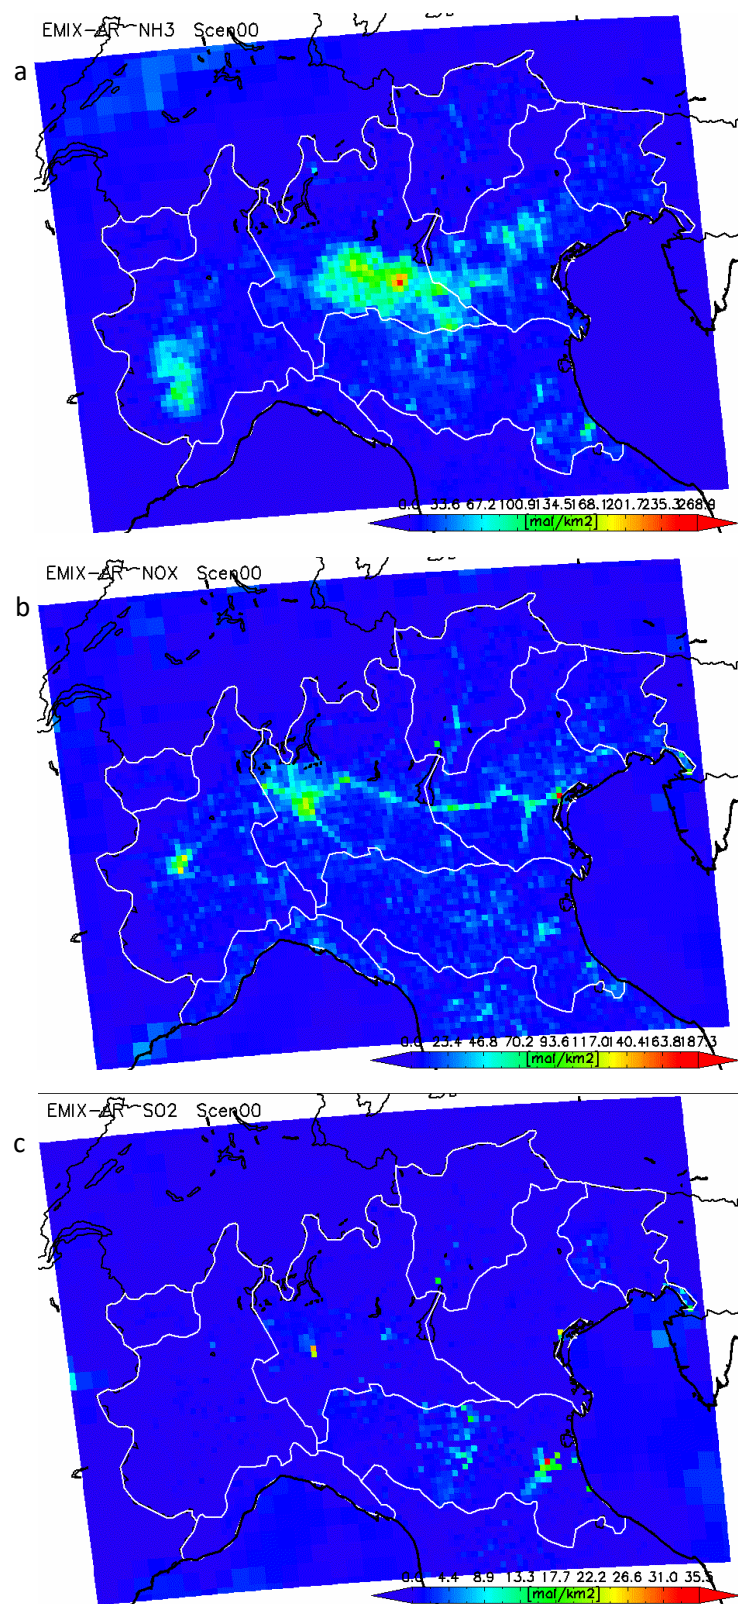

Figure S4. Emissions of  $\text{NH}_3$  (a),  $\text{NO}_x$  (b) and  $\text{SO}_2$  (c) in the studied domain in 2010.



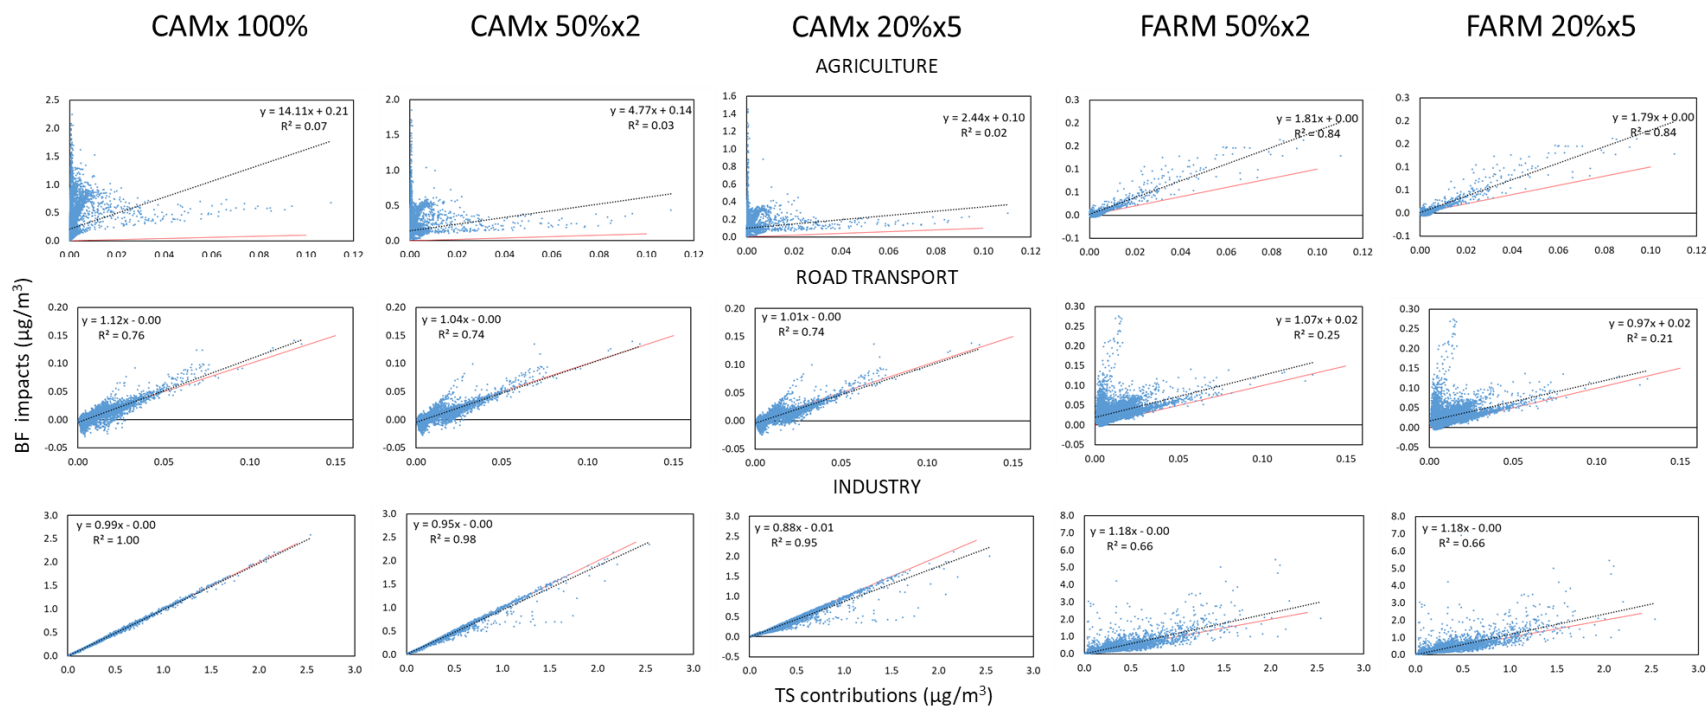

Figure S5. Scatter plots of the BF impacts (CAMx and FARM) on particulate sulfate versus the TS contributions (PSAT) for 20%, 50% and 100% ERLs. Agriculture (AGR), industry (IND) and traffic (TRA).

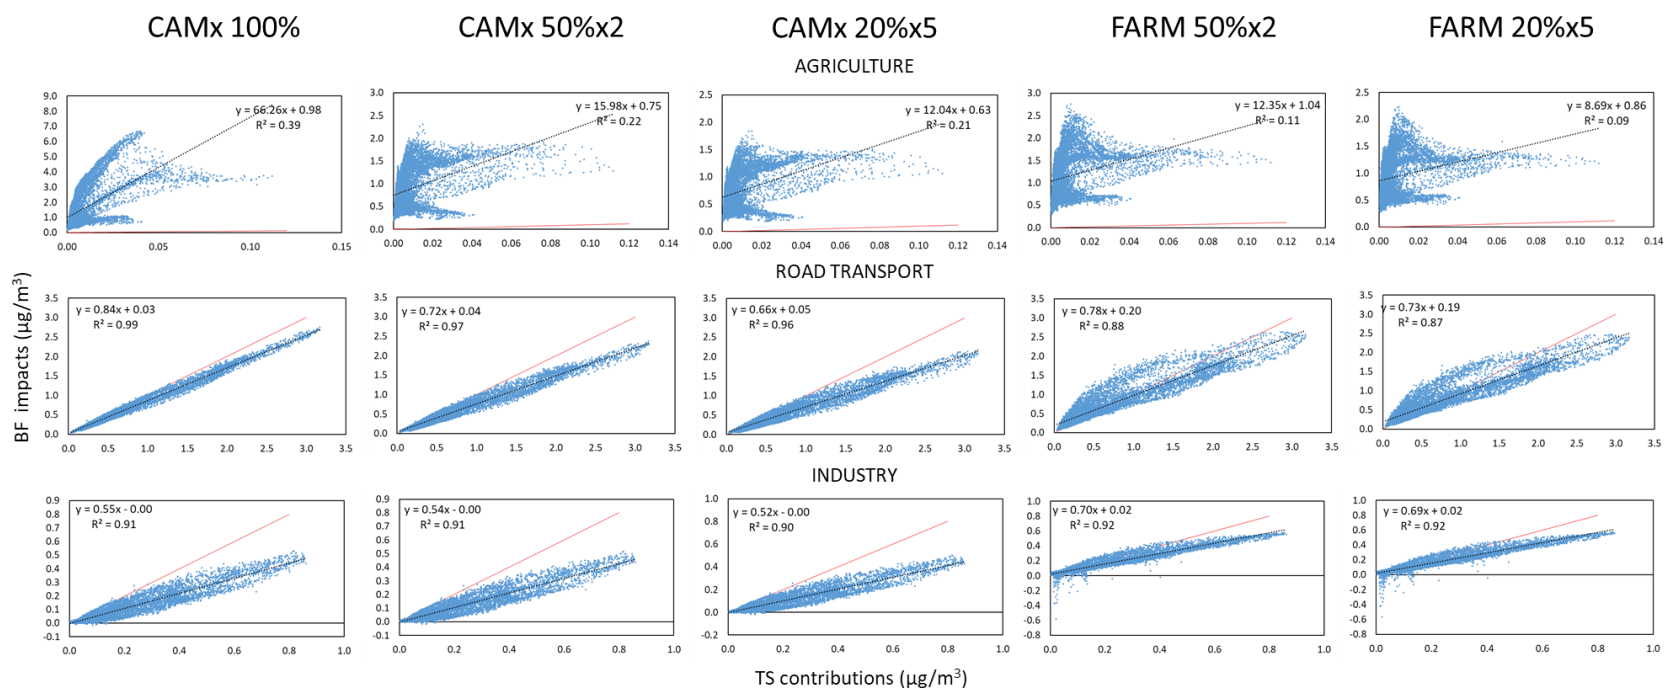

Figure S6. Scatter plots of the BF impacts (CAMx and FARM) on particulate nitrate versus the TS contributions (PSAT) for 20%, 50% and 100% ERLs. Agriculture (AGR), industry (IND) and traffic (TRA).

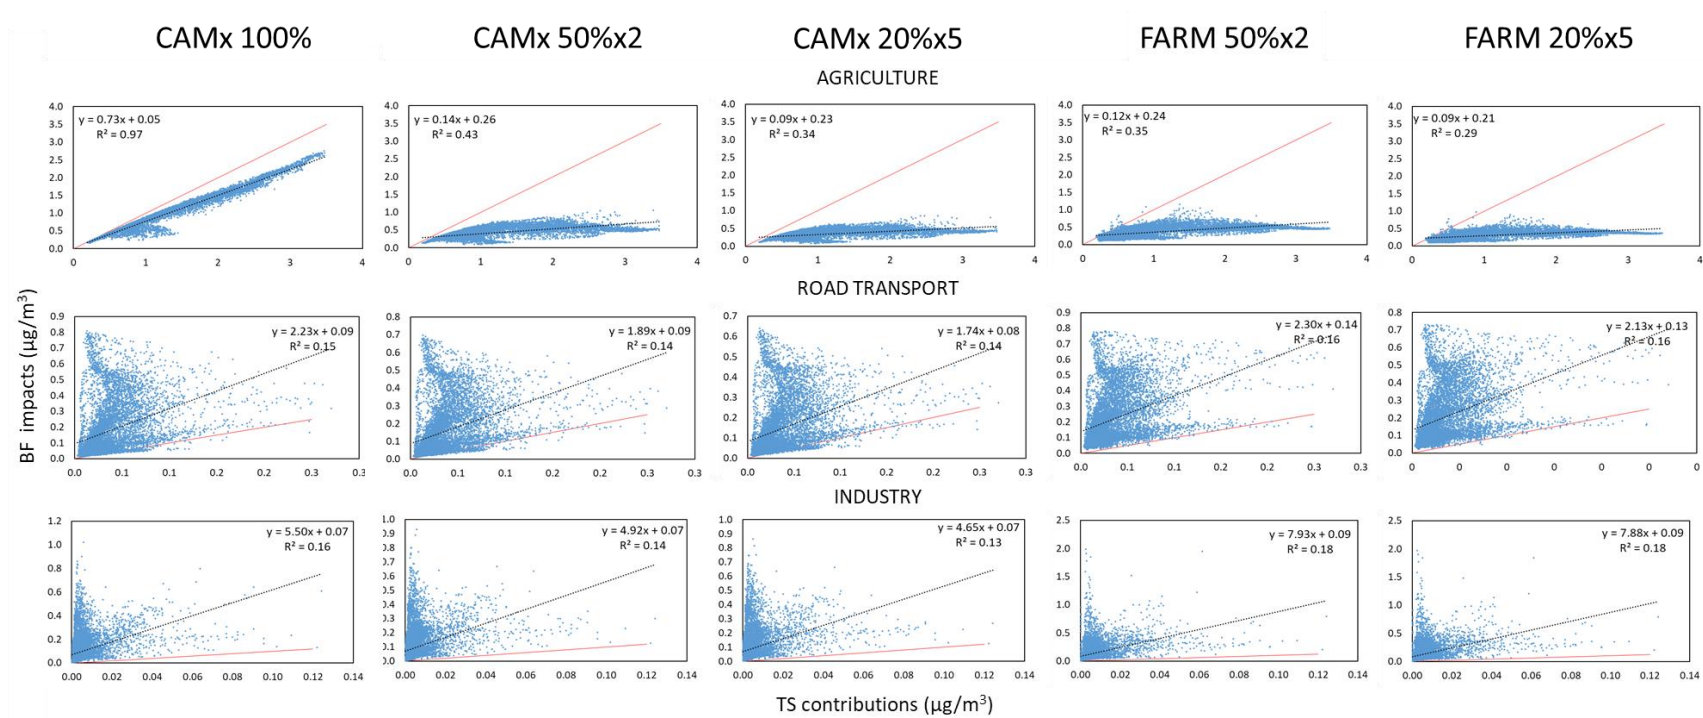

Figure S7. Scatter plots of the BF impacts (CAMx and FARM) on particulate ammonium versus the TS contributions (PSAT) for 20%, 50% and 100% ERLs. Agriculture (AGR), industry (IND) and traffic (TRA).

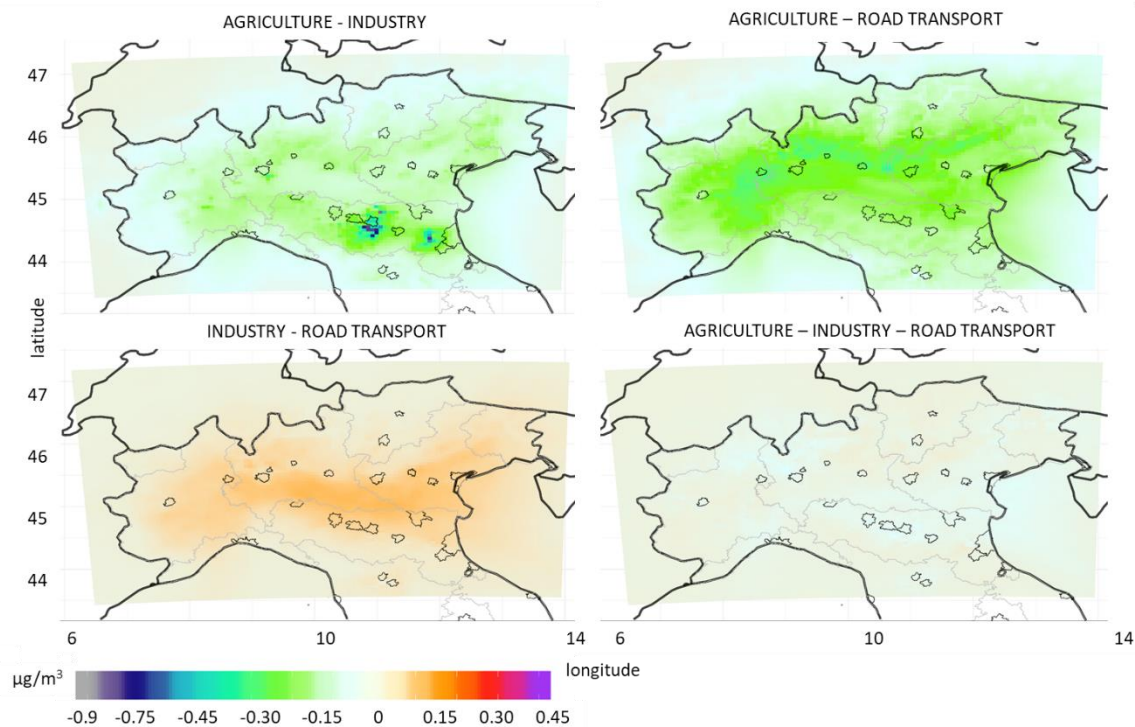

Figure S8 Map of the binary and ternary interaction terms of the  $PM_{10}$  factor decomposition for AGR, IND and TRA in the CAMx 50% scenarios.

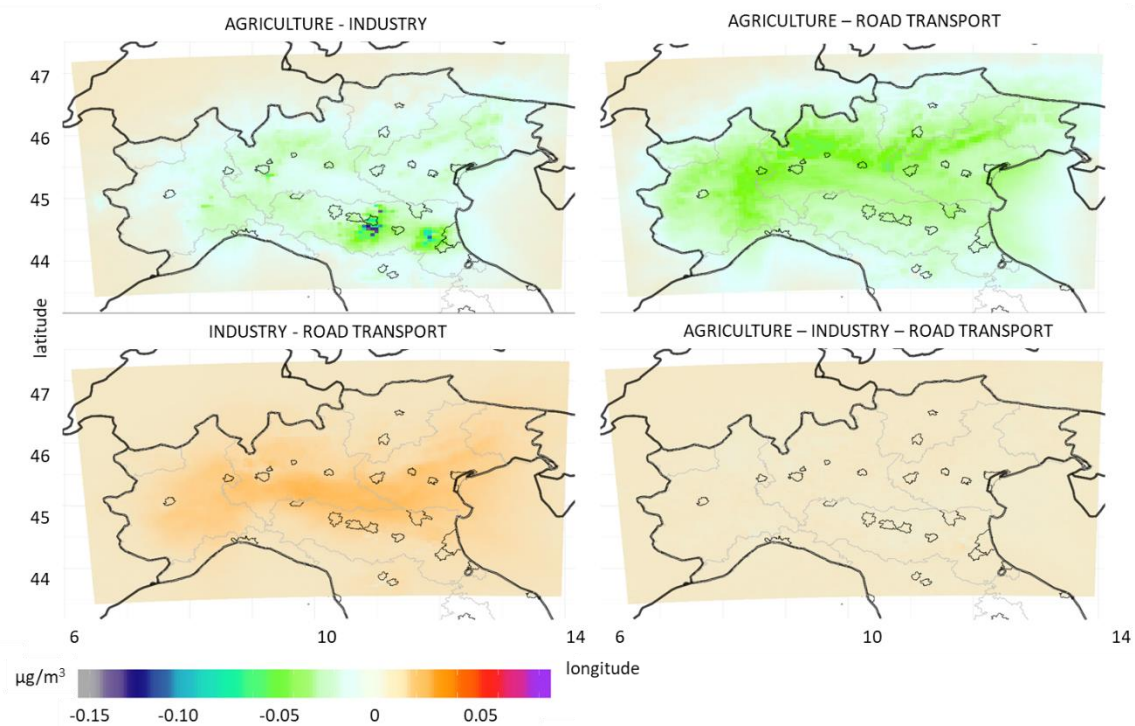

Figure S9 Map of the binary and ternary interaction terms of the  $PM_{10}$  factor decomposition for AGR, IND and TRA in the CAMx 20% scenarios.



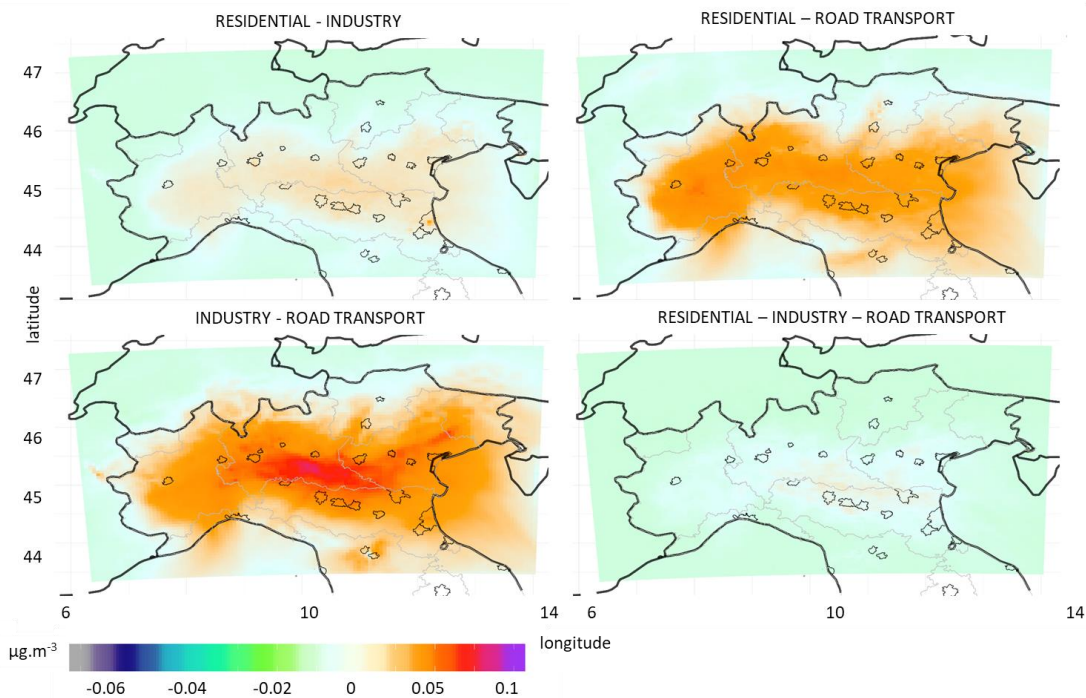

Figure S10 Map of the binary and ternary interaction terms of the PM<sub>10</sub> factor decomposition for RES, IND and TRA in the FARM 50% scenarios.

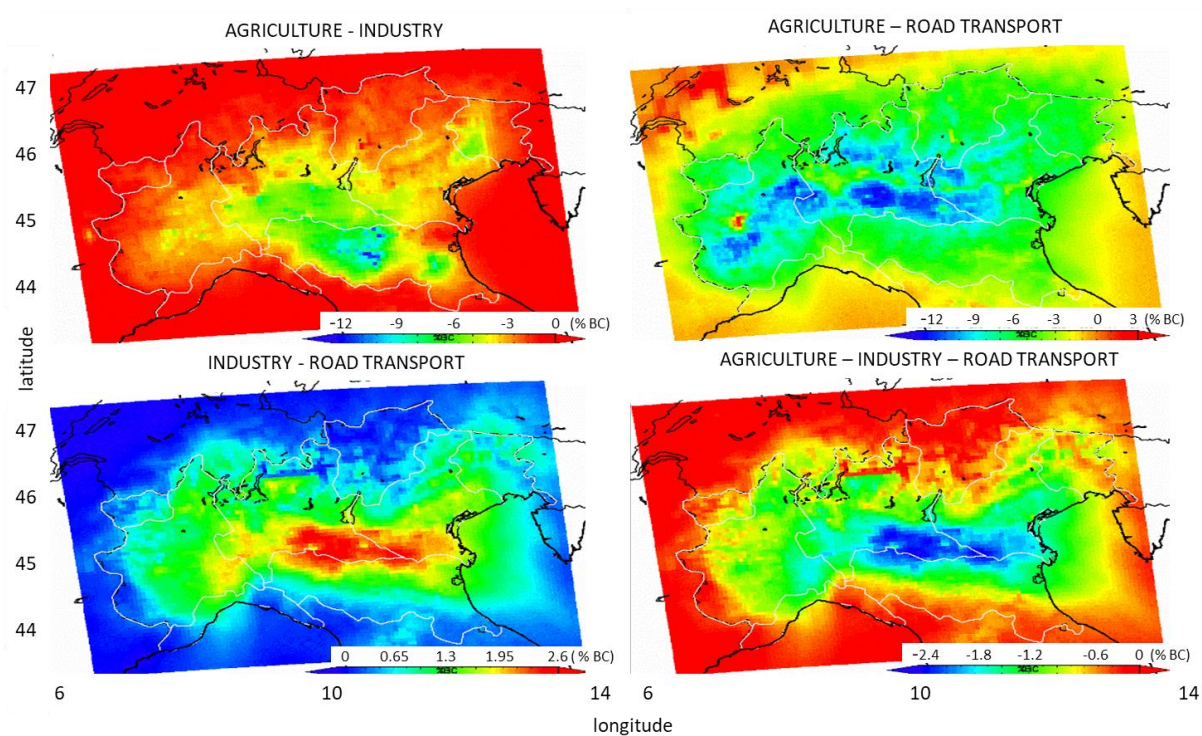

Figure S11 Map of the binary and ternary interaction terms of the PM<sub>10</sub> factor decomposition for AGR, IND and TRA in the CAMx 100% scenarios expressed as percentage of the base case.



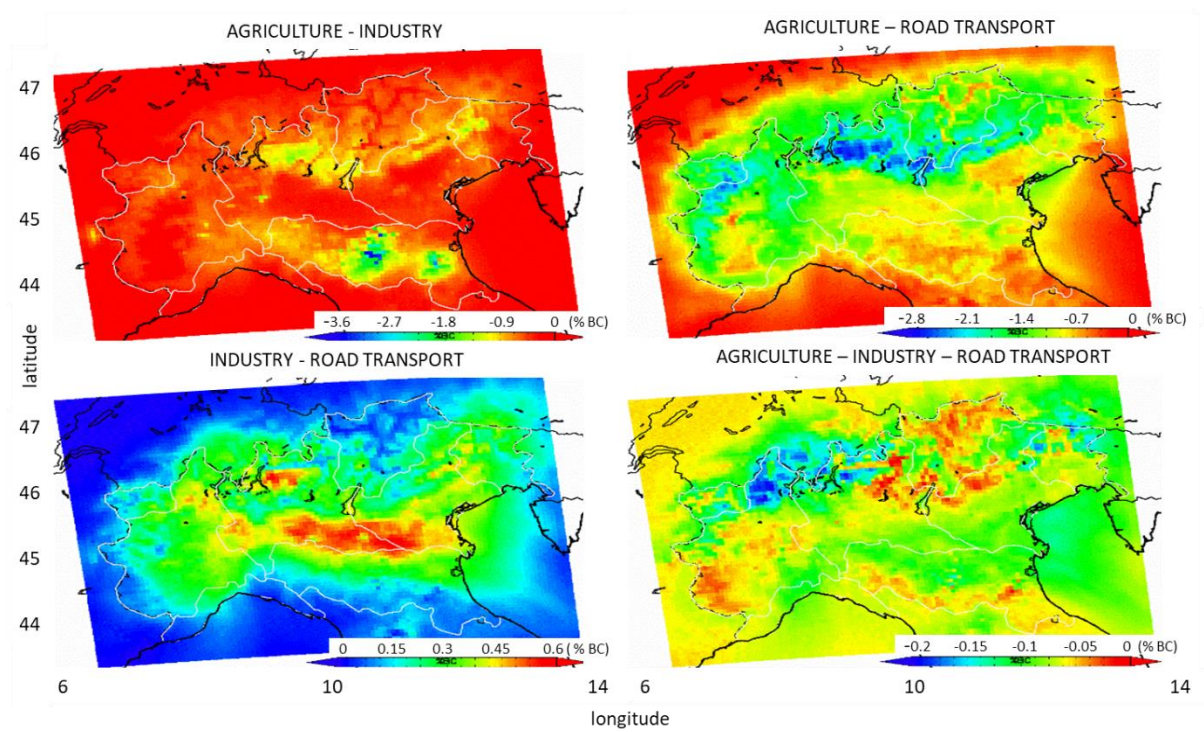

Figure S12 Map of the binary and ternary interaction terms of the PM<sub>10</sub> factor decomposition for AGR, IND and TRA in the CAMx 50% scenarios expressed as percentage of the base case.
